# Supplementary material for: Human Amniotic Mesenchymal Stem Cells and Fibroblasts Accelerate Wound Repair of Cystic Fibrosis Epithelium
Source: MDPI journal article supplement (doi:10.3390/life12050756), 2022-05-19
Supplement: s1 [file s1]

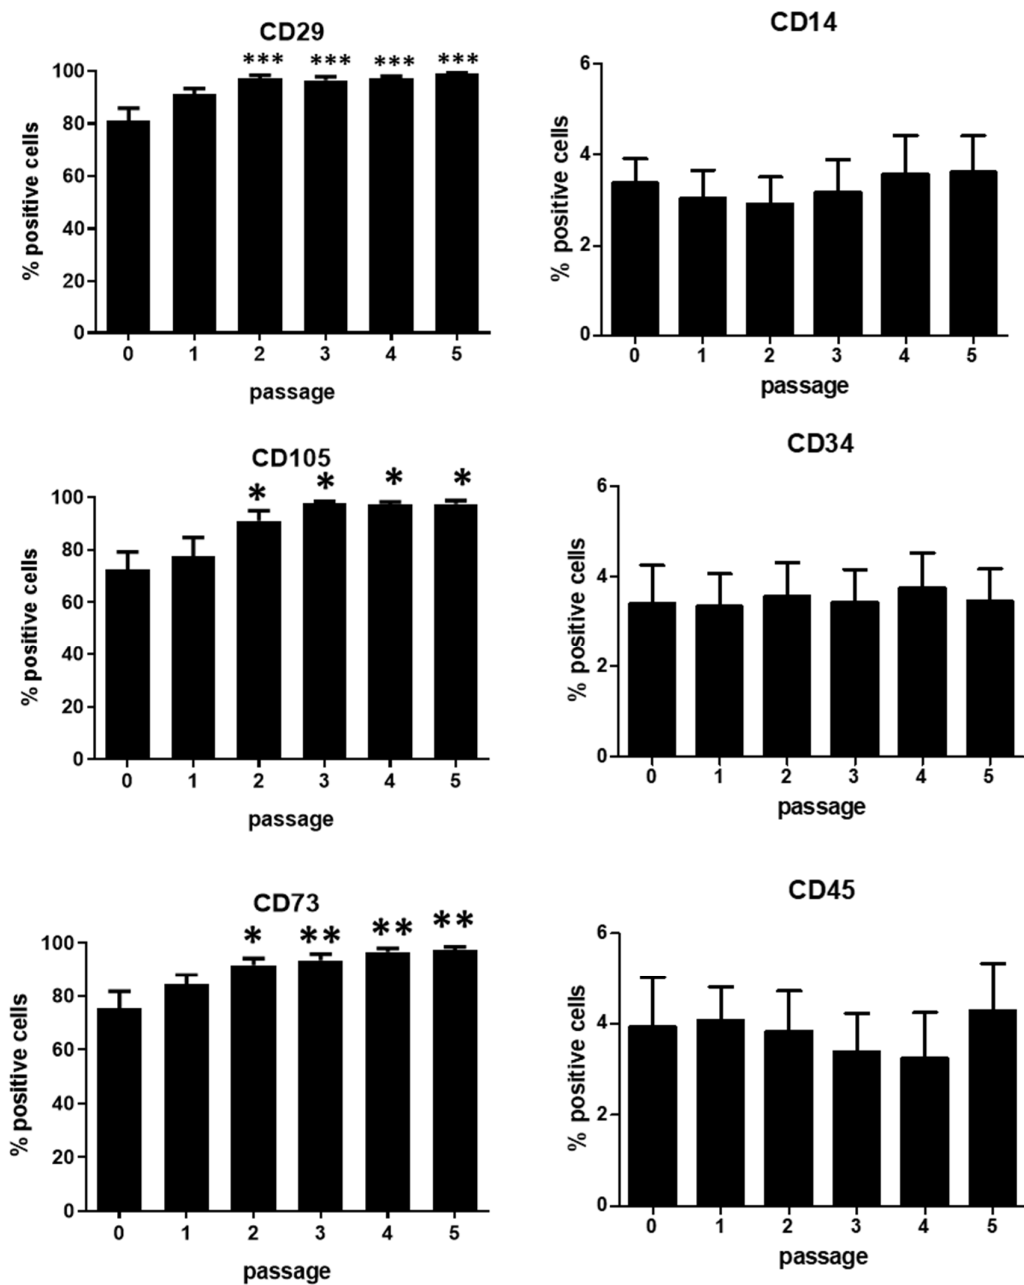

Supplementary Figure S1. Marker expression in hAMSCs. hAMSCs were evaluated for CD29, CD105, CD73, CD14, CD34, and CD 45 at isolation (p0) and p1-5 by flow cytometry. Results are expressed as mean  $\pm$  SD of triplicates for each isolate. \* $p < 0.05$ ; \*\* $p < 0.01$ , \*\*\* $p < 0.001$ .

**A**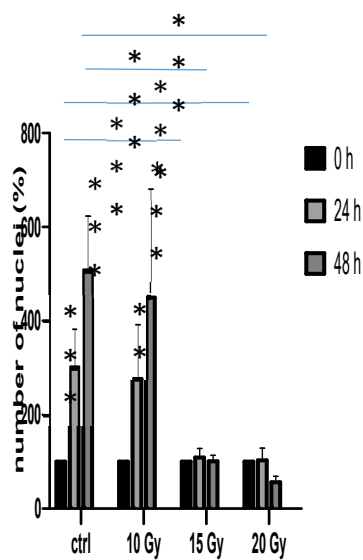**E**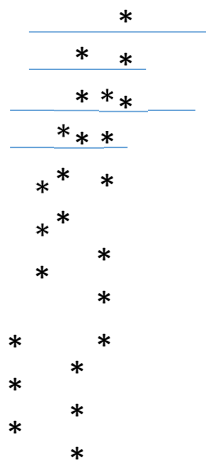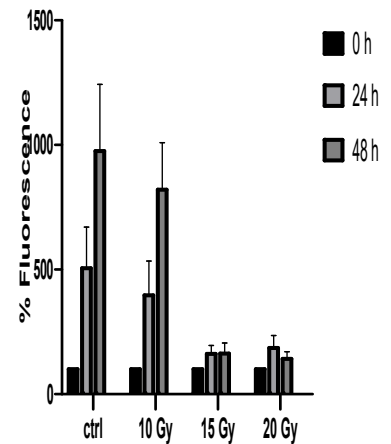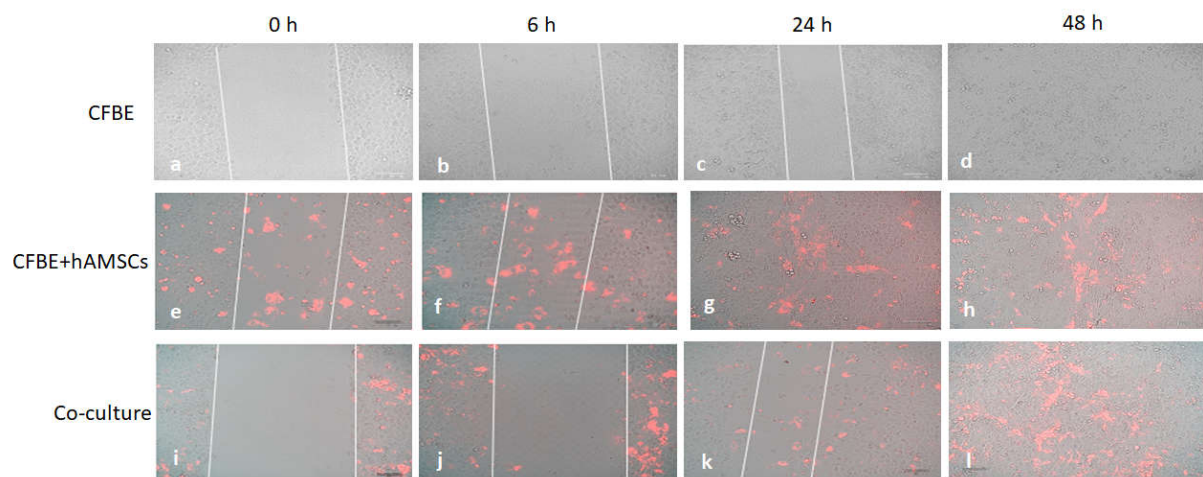

**Supplementary Figure S2.** Wound closure in the presence of fluorescent hAMSCs. Injury was determined on CFBE (a-d), CFBE with the addition of CM-Dil-labeled hAMSCs ( $6 \times 10^4$ ) after wound (e-h), and CM-Dil-hAMSC:CFBE co-cultures (i-l). Wound closure was evaluated at 0 h (a, e, i), 6 h (b, f, j), 24 h (c, g, k), and 48 h (d, h, l). White lines denote wound edges. Bar = 100  $\mu$ m.

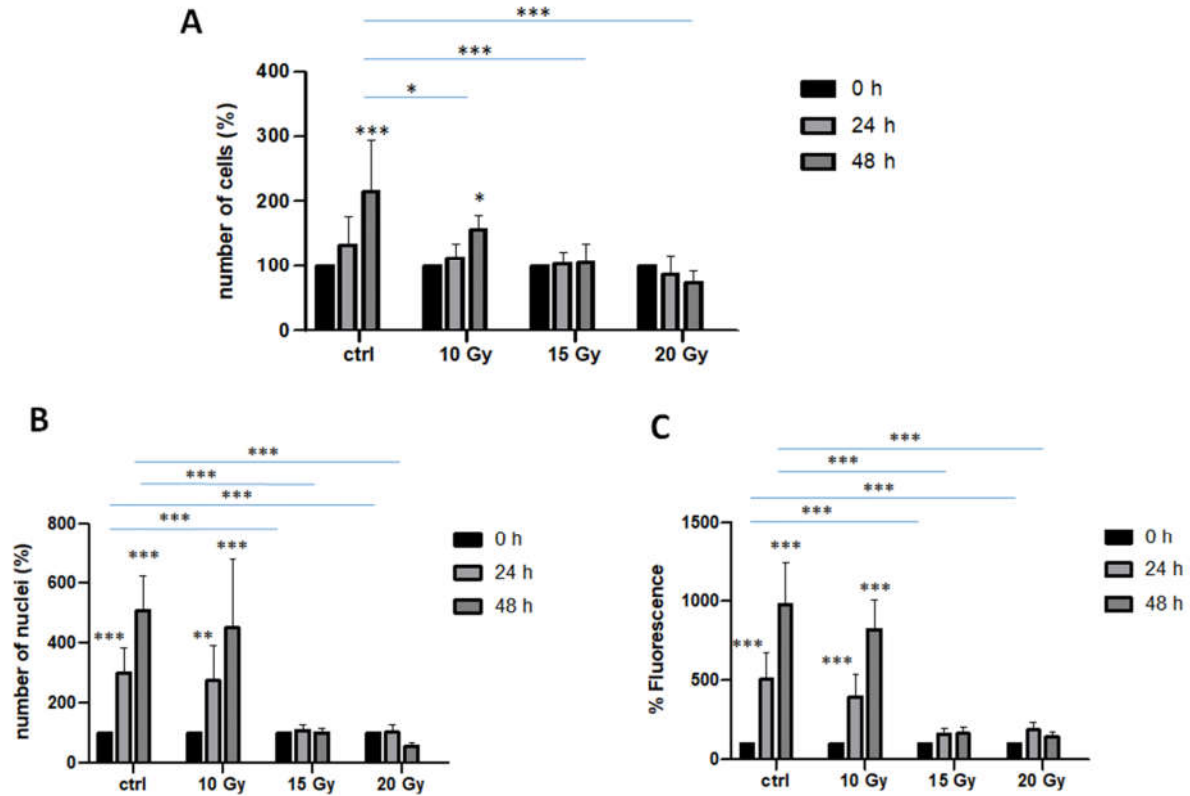

**Supplementary Figure S3.** CFBE proliferation is blocked by  $\gamma$ -rays. CFBE cells were irradiated at different doses of  $\gamma$ -rays (10, 15, or 20 Gy) and evaluated for cell numbers (A), numbers of DAPI-stained nuclei (B) or DAPI-associated fluorescence (C) as compared with untreated controls (ctrl). In each condition, time 0 is considered as 100%. Results are shown as mean  $\pm$  SD of three experiments. \* $p < 0.05$ ; \*\* $p < 0.01$ ; \*\*\* $p < 0.001$ .

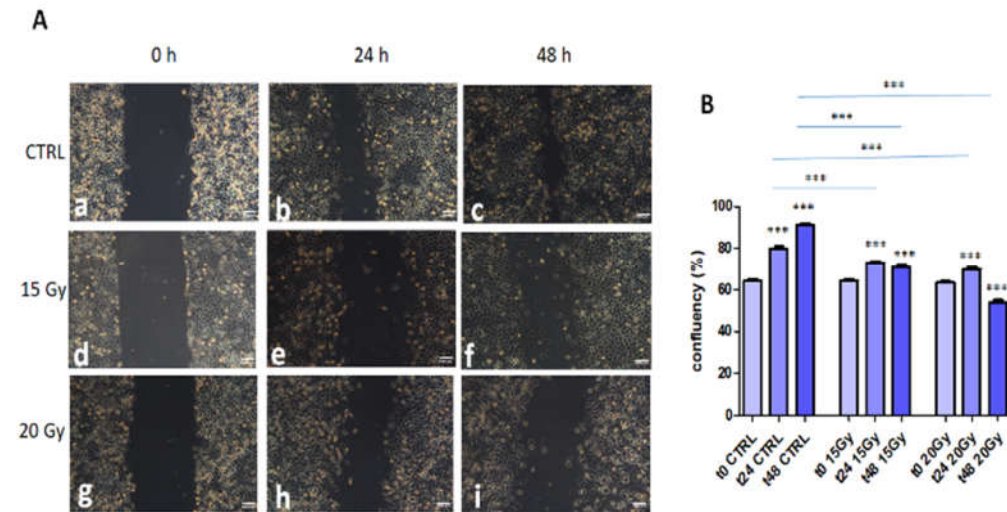

**Supplementary Figure S4.** Wound closure of CFBE monolayers after  $\gamma$ -irradiation. A) CFBE monolayers were  $\gamma$ -irradiated with 15 Gy (d, e, f) or 20 Gy (g, h, i) and then wounded. Control monolayers were not irradiated (a, b, c). Wound closure was evaluated at time 0 (a, d, g), 24 h (b, e, h) and 48 h (c, f, i). Bar = 100  $\mu$ m. B) Percentages of wound closure of non-irradiated CFBE, CFBE irradiated with 15 Gy, and CFBE irradiated with 20 Gy. \*\*\* $p < 0.001$ .
